# Supplementary material
Source: Springer Nature journal article supplement (https://www.springermedizin.de/resource/supplementary/12916_2010_296_MOESM3_ESM.pdf/9599576)
Supplement: MOESM3 [file 9599576]

Difference from general population in average quality of life scores

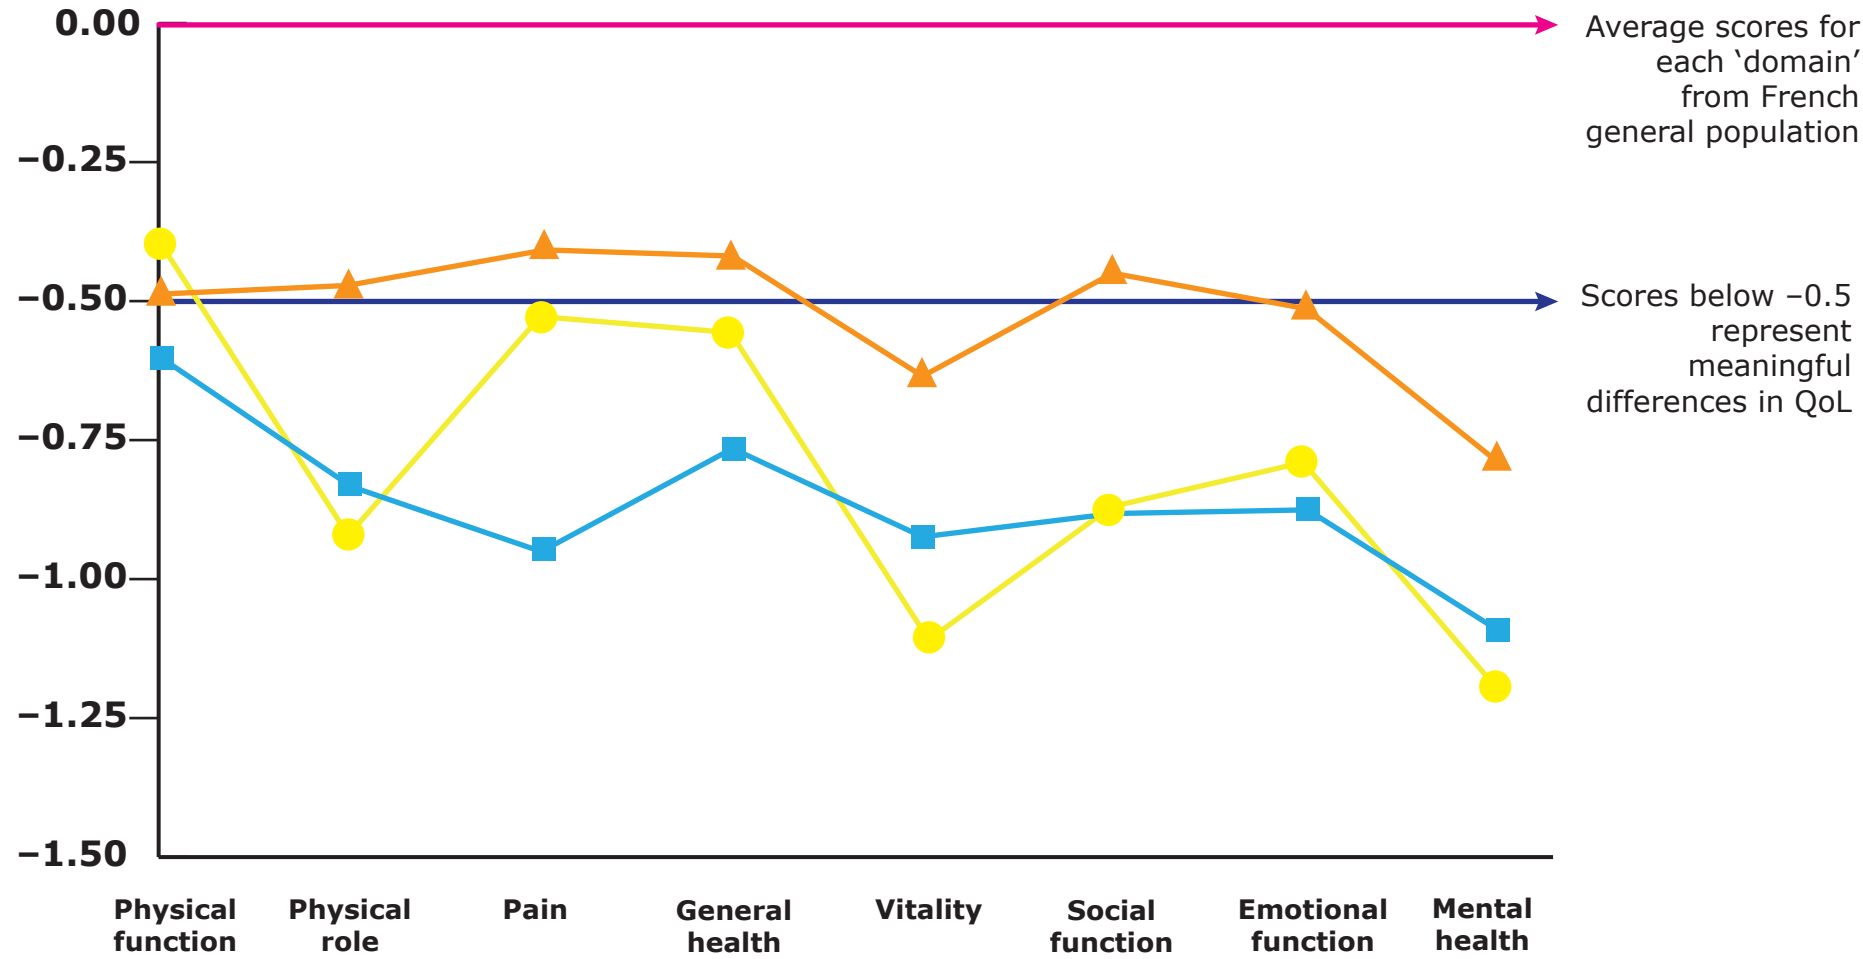

- ▲ Acute HZ; n = 2948 men, 3755 women (general population, n = 298 men, 379 women)
- Complicated HZ; n = 22 men, 23 women (general population, n = 88 men, 92 women)
- PHN; n = 335 men, 481 women (general population, n = 167 men, 234 women)
